# Supplementary material for: PDn-3 DPA Pathway Regulates Human Monocyte Differentiation and Macrophage Function
Source: PubMed Central journal article supplement (PMC6024030; doi:10.1016/j.chembiol.2018.04.017), 2018-06-21
Supplement: mmc1.pdf [file mmc1.pdf]

**Cell Chemical Biology, Volume 25**

**Supplemental Information**

**PD<sub>n-3</sub> DPA Pathway Regulates Human Monocyte**

**Differentiation and Macrophage Function**

**Kimberly Pistorius, Patricia R. Souza, Roberta De Matteis, Shani Austin-Williams, Karoline G. Primdahl, Anders Vik, Francesca Mazzacuva, Romain A. Colas, Raquel M. Marques, Trond V. Hansen, and Jesmond Dalli**

Figure S1

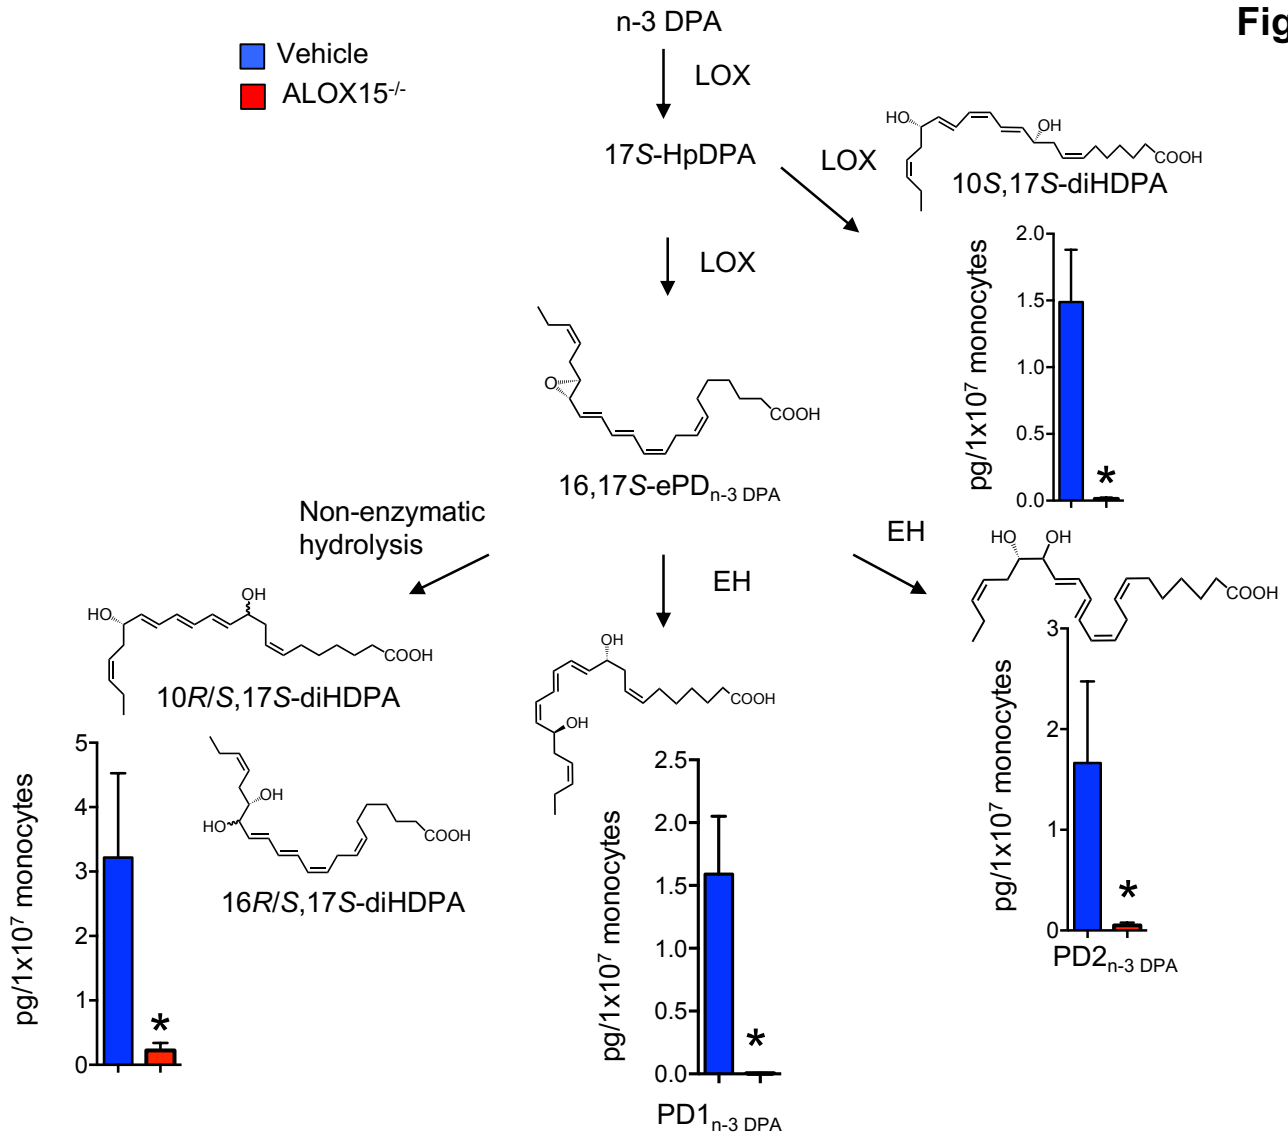

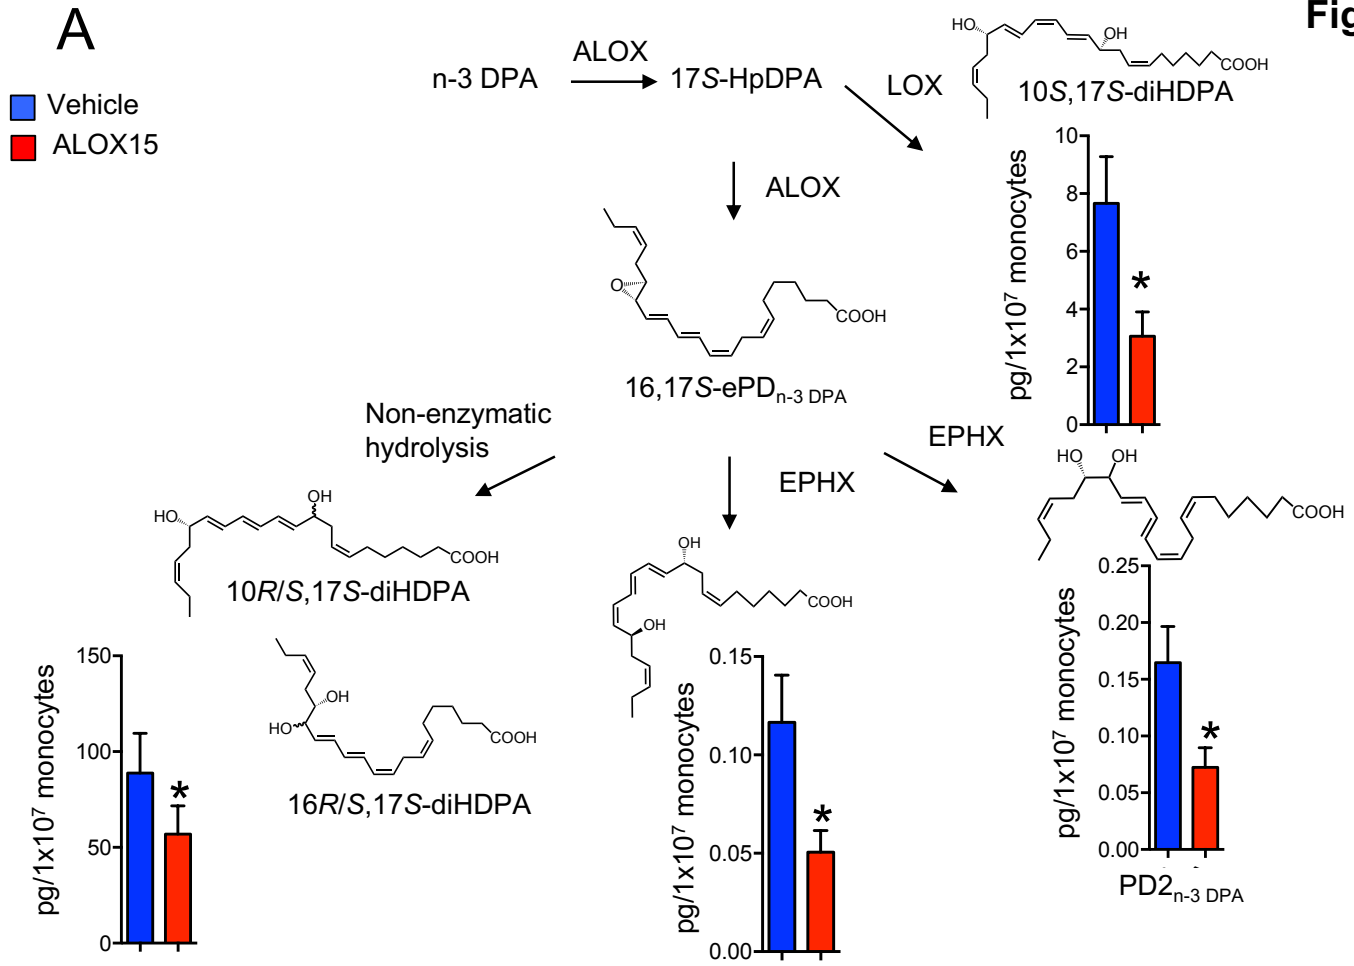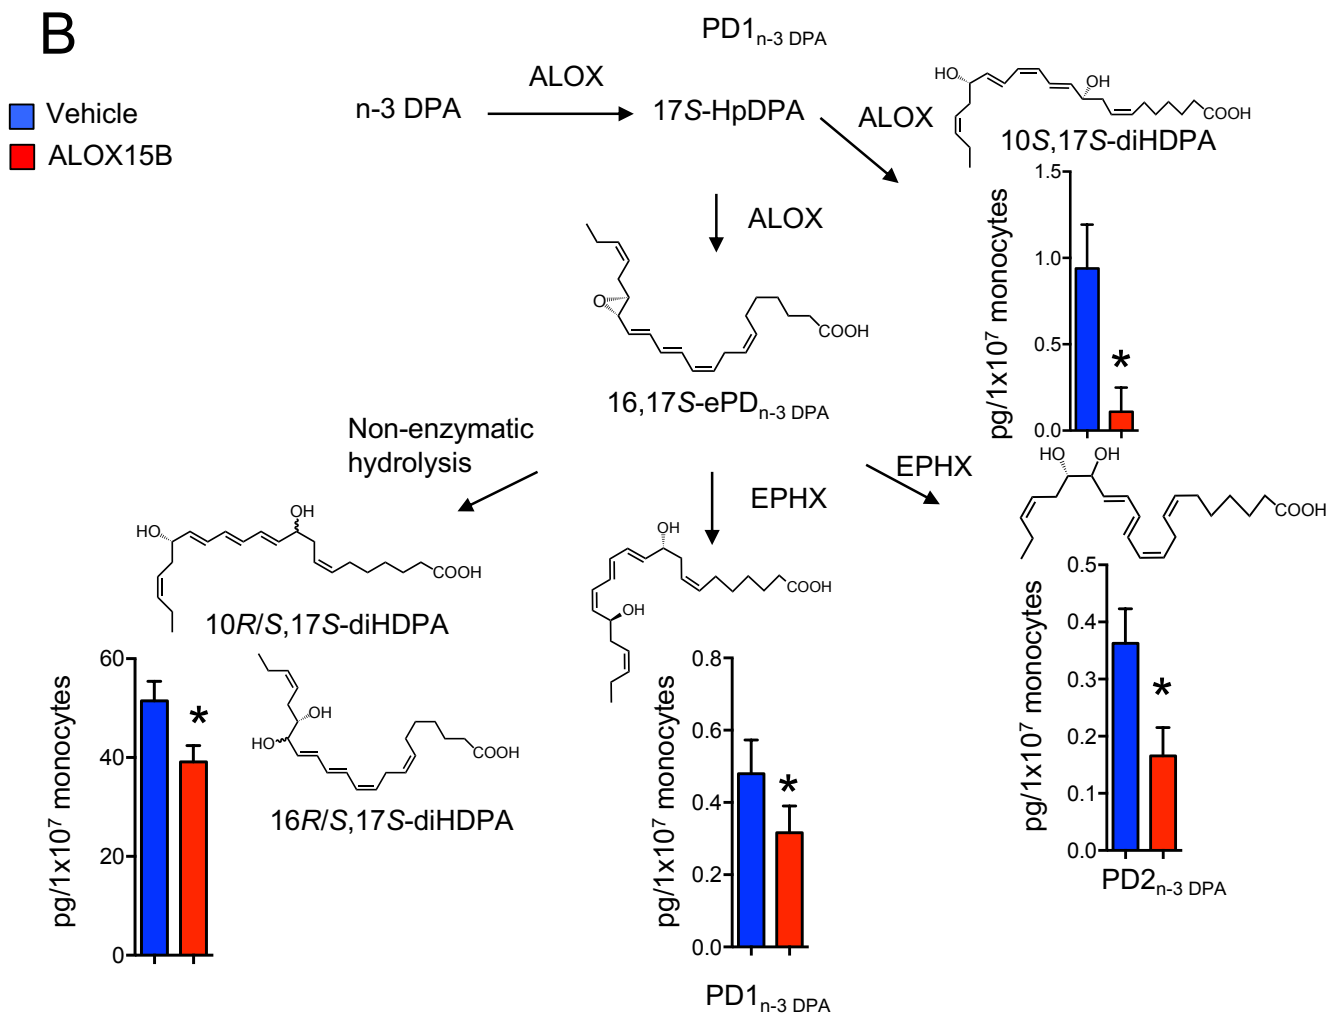



Figure S4

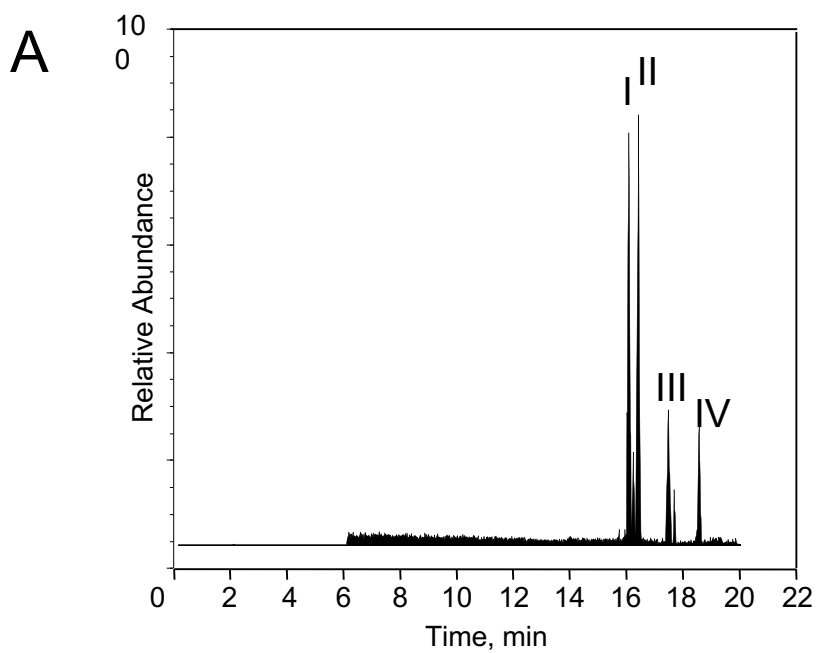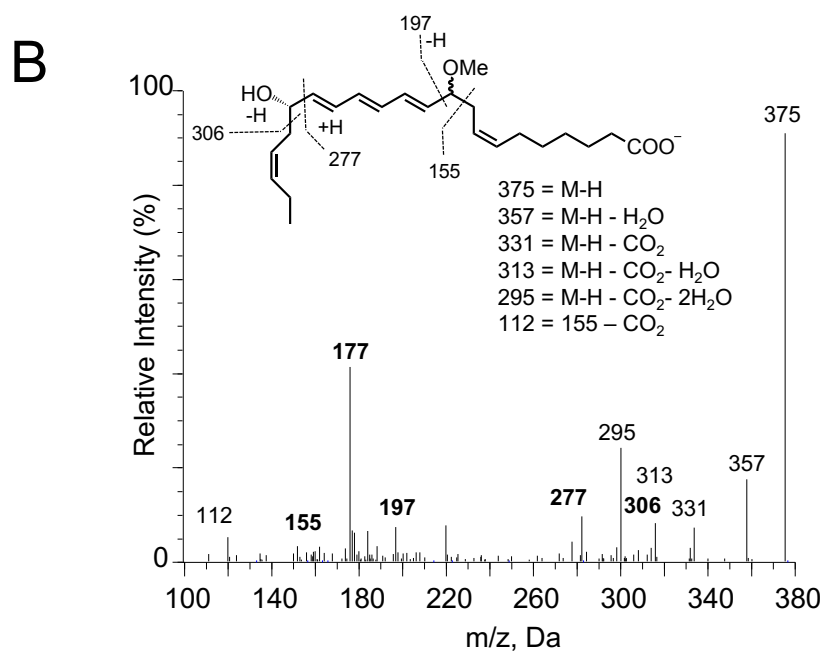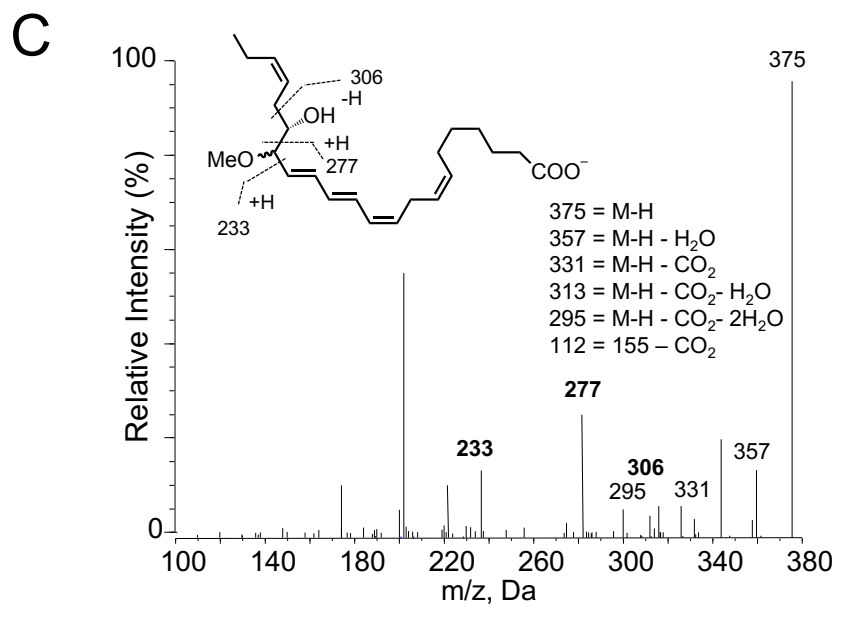

A

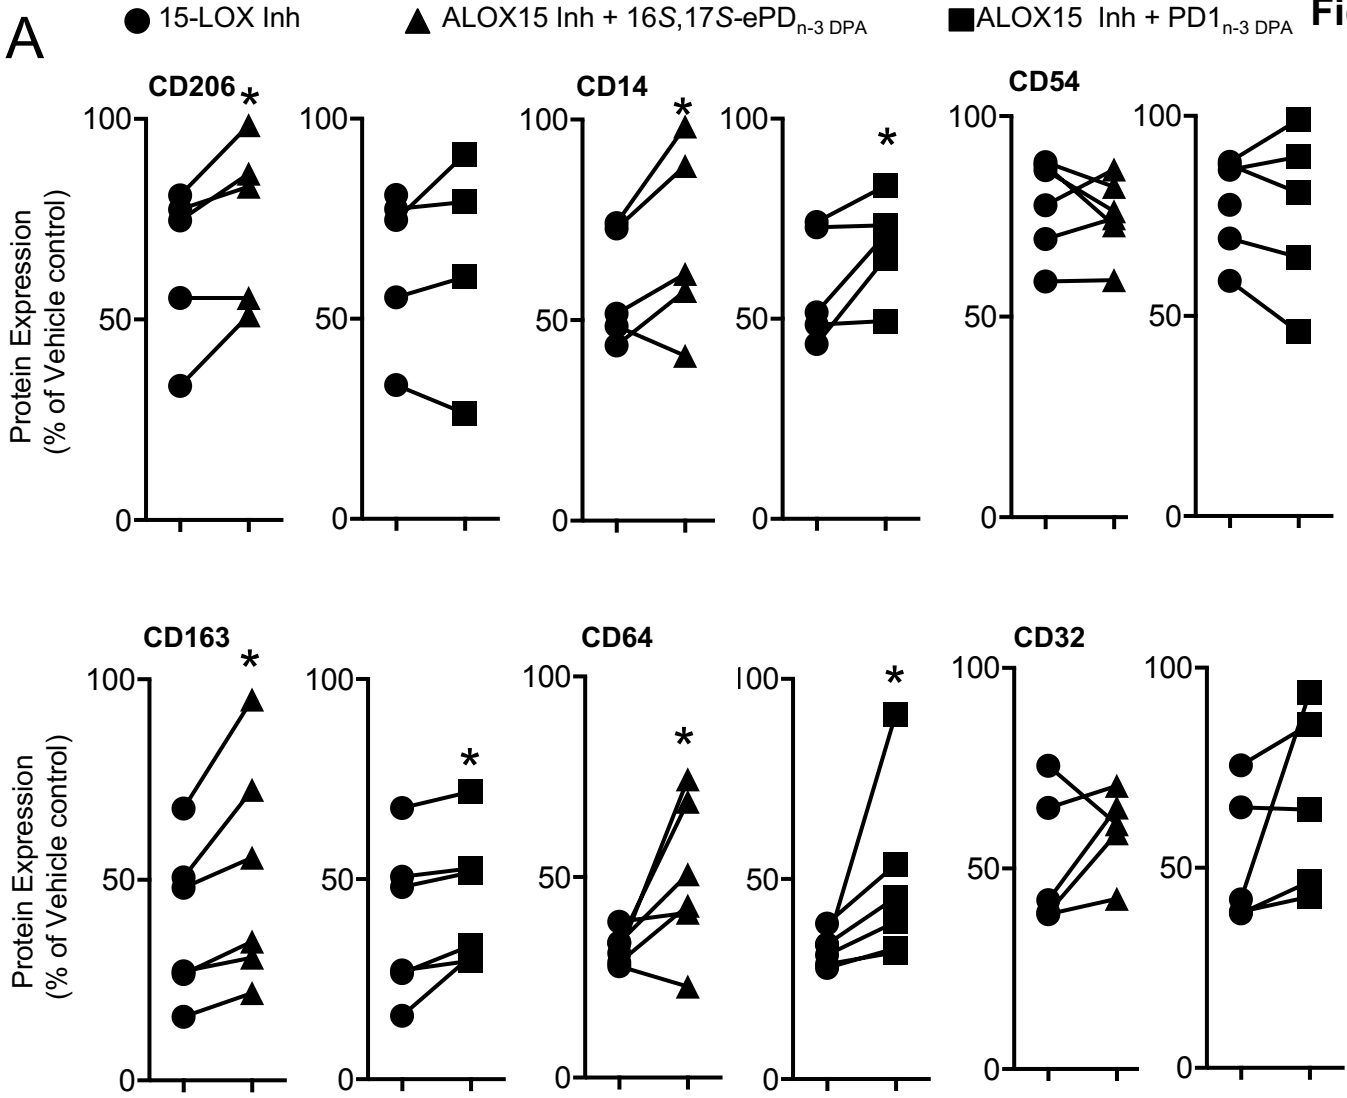

B

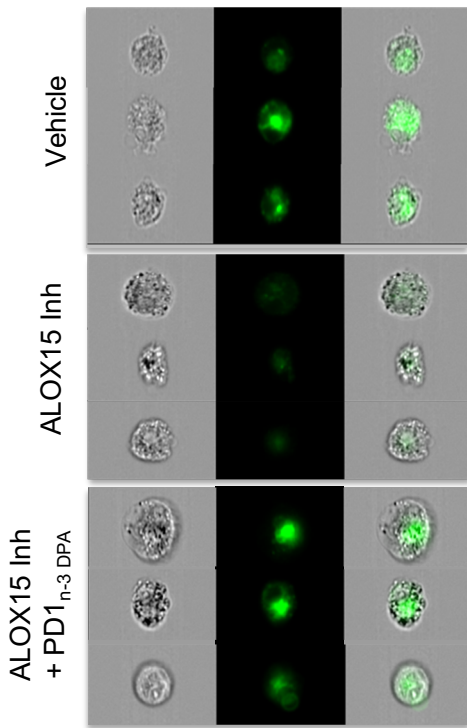

C

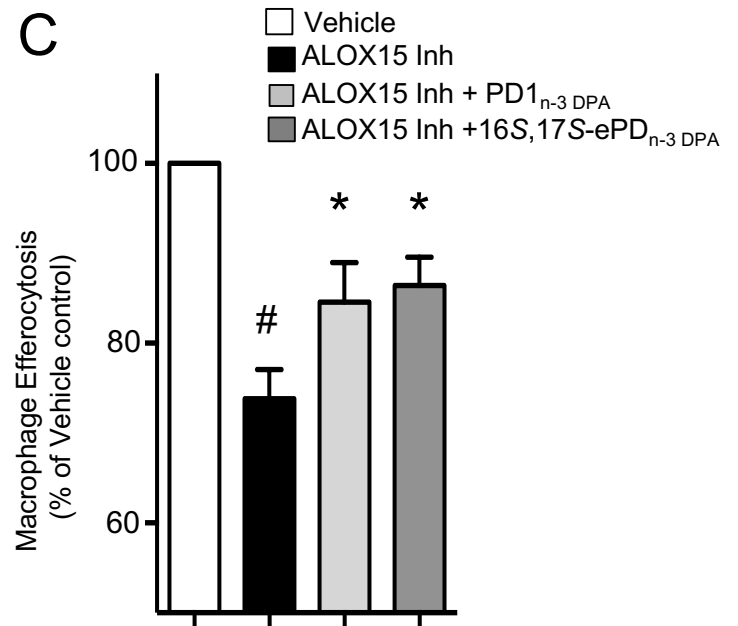

## Supplemental Figures

**Figure S1: Decreased PD<sub>n-3 DPA</sub> in ALOX15 deficient mice.** Related to Figure 1 and Table S1.

Bone marrow monocytes were isolated from WT or ALOX15 deficient mice. These ( $2 \times 10^6$  cells/ml) were then incubated with *E. coli* ( $1 \times 10^8$  CFU/mL) for 30 min (37°C; PBS<sup>+/+</sup>). Incubations were quenched with ice-cold methanol and products identified and quantified using lipid mediator profiling. Results are mean  $\pm$  SEM. n = 4 mice per group. \* P < 0.05.

**Figure S2: Knockdown of both ALOX15 and ALOX15B reduces PD<sub>n-3 DPA</sub> biosynthesis in human monocytes.** Related to Figure 1.

Human monocytes were transfected with shRNA to (A) ALOX15, (B) ALOX15B or CT shRNA (see methods for details). The cells ( $1 \times 10^6$  cells/mL) were incubated with *E. coli* ( $5 \times 10^7$  CFU/mL) for 45 min (37°C) and PD<sub>n-3 DPA</sub> levels were ascertained using lipid mediator profiling. Results are mean  $\pm$  SEM. n = 5 donors.

**Figure S3: Characterizing the synthetic 16S,17S-ePD<sub>n-3 DPA</sub>.** Related to Figure 3. (A)

<sup>1</sup>H-NMR spectrum of methyl (7Z,10Z,12E,14E)-15-((2S,3S)-3-((Z)-pent-2-en-1-yl)oxiran-2-yl)pentadeca-7,10,12,14-tetraenoate (methyl ePD1<sub>n-3 DPA</sub>). (B) <sup>13</sup>C-NMR spectrum of methyl (7Z,10Z,12E,14E)-15-((2S,3S)-3-((Z)-pent-2-en-1-yl)oxiran-2-yl)pentadeca-7,10,12,14-tetraenoate (methyl ePD1<sub>n-3 DPA</sub>). (C) HSQC spectrum of methyl (7Z,10Z,12E,14E)-15-((2S,3S)-3-((Z)-pent-2-en-1-yl)oxiran-2-yl)pentadeca-7,10,12,14-tetraenoate (methyl ePD1<sub>n-3 DPA</sub>). (D) HRMS of methyl (7Z,10Z,12E,14E)-15-((2S,3S)-3-((Z)-pent-2-en-1-yl)oxiran-2-yl)pentadeca-7,10,12,14-tetraenoate (methyl ePD1<sub>n-3 DPA</sub>).

**Figure S4: Acid alcohol trapping product profile for synthetic 16S,17S-ePD<sub>n-3 DPA</sub>.** Related to Figure 2.

The epoxide was incubated in acidified methanol and products were profiled using LC/MS-MS. (A) MRM chromatogram for ion pairs *m/z* 375>277. (B-C) MS-MS spectra employed in the identification of (B) 10-methoxy,17S-hydroxy-7Z,11E,13E,15E,19Z-docosapentaenoic acid and (C) 16-methoxy,17S-hydroxy-7Z,10Z,12E,14E,19Z-docosapentaenoic acid in monocyte incubations.

**Figure S5: 16S,17S-ePD<sub>n-3 DPA</sub> and PD1<sub>n-3 DPA</sub> rectify monocyte differentiation following ALOX15 inhibition restoring macrophage responses.** Related to Figure 7.

Human monocytes were incubated with M-CSF (20ng/mL) and 15-LOX inhibitor (10 $\mu$ M), ALOX15 inhibitor + 16S, 17S-ePD<sub>n-3 DPA</sub> (1nM), ALOX15 inhibitor + PD1<sub>n-3 DPA</sub> (1nM), or vehicle (37°C, 5% CO<sub>2</sub> in RPMI supplemented with human serum). On day 7 (A) cells were collected and expression of lineage markers was determined using fluorescently labelled antibodies and flow cytometry. (B-C) cells were incubated with fluorescently labelled apoptotic cells for 45 min (37°C) and phagocytosis was evaluated using (B) ImageStream (C) fluorescent plate reader. \* P < 0.05 vs ALOX15 inhibitor incubations; # P < 0.05 versus vehicle incubations.

## Supplemental Tables

**Table S1: ALOX15 inhibitor shifts human monocyte-derived macrophage lipid mediator profiles** Related to Figure 1.

| DHA bioactive metabolome              | Q1  | Q3  | Vehicle           | ALOX15 inhibitor  |
|---------------------------------------|-----|-----|-------------------|-------------------|
| RvD1                                  | 375 | 141 | 26.8 ± 4.6        | 13.3 ± 3.3 *      |
| RvD2                                  | 375 | 141 | 127.6 ± 42.8      | 62.9 ± 42.5 *     |
| RvD3                                  | 375 | 147 | 19.3 ± 7.6        | 10.4 ± 5.2        |
| RvD4                                  | 375 | 101 | 172.6 ± 33.9      | 127.7 ± 42.7      |
| RvD5                                  | 359 | 199 | 104.1 ± 37.4      | 65.6 ± 31.9 *     |
| RvD6                                  | 359 | 101 | 639.4 ± 233.8     | 532.5 ± 187.5 *   |
| 17R-RvD1                              | 375 | 141 | 47.0 ± 18.8       | 19.0 ± 5.7        |
| 17R-RvD3                              | 375 | 147 | 12.5 ± 4.2        | 8.3 ± 4.3         |
| PD1                                   | 359 | 153 | 24.4 ± 6.2        | 16.6 ± 5.7 *      |
| 10S,17S-diHDHA                        | 359 | 153 | 309.0 ± 114.3     | 220.8 ± 92.3 *    |
| 17R-PD1                               | 359 | 153 | 18.7 ± 10.7       | 17.0 ± 12.3       |
| 22-OH-PD1                             | 375 | 153 | 7.4 ± 3.8         | 4.8 ± 3.1 *       |
| MaR1                                  | 359 | 221 | 64.2 ± 56.6       | 22.1 ± 10.5       |
| MaR2                                  | 359 | 191 | 184.0 ± 98.9      | 161.2 ± 88.0      |
| 7S,14S-diHDHA                         | 359 | 221 | 259.9 ± 87.3      | 427.0 ± 143.6     |
| 22-OH-MaR1                            | 375 | 221 | 196.1 ± 79.5      | 200.1 ± 74.6      |
| 4S,14S-diHDHA                         | 359 | 101 | 69.7 ± 61.7       | 20.5 ± 9.9        |
| 14-oxo-MaR1                           | 357 | 248 | 16.3 ± 7.4        | 9.5 ± 5.4         |
| <b>n-3 DPA bioactive metabolome</b>   |     |     |                   |                   |
| RvT1                                  | 377 | 239 | 39.9 ± 21.2       | 26.7 ± 12.3       |
| RvT2                                  | 377 | 197 | 34.6 ± 21.6       | 25.8 ± 16.7       |
| RvT3                                  | 377 | 197 | 22.1 ± 12.8       | 10.0 ± 3.9        |
| RvT4                                  | 361 | 211 | 36.0 ± 11.2       | 62.7 ± 34.6       |
| RvD1 <sub>n-3 DPA</sub>               | 377 | 143 | 39.8 ± 16.5       | 28.0 ± 15.0 *     |
| RvD2 <sub>n-3 DPA</sub>               | 377 | 143 | 21.2 ± 8.5        | 12.9 ± 3.1        |
| RvD5 <sub>n-3 DPA</sub>               | 361 | 199 | 125.2 ± 32.7      | 76.6 ± 16.1 *     |
| PD1 <sub>n-3 DPA</sub>                | 361 | 183 | 32.5 ± 9.1        | 11.0 ± 1.2 *      |
| PD2 <sub>n-3 DPA</sub>                | 361 | 263 | 27.5 ± 10.0       | 13.4 ± 8.2 *      |
| 10S, 17S-diHDPA                       | 361 | 183 | 33.9 ± 7.6        | 19.5 ± 3.6 *      |
| Δ15trans-PD1 <sub>n-3 DPA</sub>       | 361 | 183 | 61.0 ± 25.9       | 52.2 ± 23.4 *     |
| 10epi-Δ15trans-PD1 <sub>n-3 DPA</sub> | 361 | 183 | 75.3 ± 19.4       | 55.0 ± 20.8 *     |
| MaR1 <sub>n-3 DPA</sub>               | 361 | 249 | 13.8 ± 7.3        | 18.2 ± 11.4       |
| 7S, 14S-diHDPA                        | 361 | 249 | 77.9 ± 28.2       | 47.6 ± 14.2       |
| <b>EPA bioactive metabolome</b>       |     |     |                   |                   |
| RvE1                                  | 349 | 195 | 18.5 ± 11.9       | 18.6 ± 12.7       |
| RvE2                                  | 333 | 199 | 269.5 ± 102.2     | 246.0 ± 112.1     |
| RvE3                                  | 333 | 201 | 93.8 ± 33.6       | 90.7 ± 39.9       |
| <b>AA bioactive metabolome</b>        |     |     |                   |                   |
| LXA <sub>4</sub>                      | 351 | 217 | 514.2 ± 307.5     | 422.7 ± 239.5     |
| LXB <sub>4</sub>                      | 351 | 221 | 602.9 ± 280.3     | 492.4 ± 228.9 *   |
| 5S,15S-diHETE                         | 335 | 235 | 5259.1 ± 1992.8   | 3585.6 ± 1638.2 * |
| 15R-LXA <sub>4</sub>                  | 351 | 217 | 386.2 ± 172.4     | 308.7 ± 146.9     |
| 15R-LXB <sub>4</sub>                  | 351 | 221 | 1848.8 ± 855.8    | 1283.9 ± 516.3    |
| LTB <sub>4</sub>                      | 335 | 195 | 175.8 ± 170.4     | 60.1 ± 58.7       |
| 5S,12S-diHETE                         | 335 | 195 | 1145.4 ± 596.4    | 1073.1 ± 586.4    |
| 20-OH-LTB <sub>4</sub>                | 351 | 195 | 1.9 ± 0.6         | 1.4 ± 0.5         |
| PGD <sub>2</sub>                      | 351 | 189 | 2191.3 ± 326.6    | 1277.4 ± 251.7 *  |
| PGE <sub>2</sub>                      | 351 | 189 | 1983.8 ± 901.7    | 1151.9 ± 507.9    |
| PGF <sub>2α</sub>                     | 353 | 193 | 466.7 ± 196.9     | 230.1 ± 45.7      |
| TxB <sub>2</sub>                      | 369 | 169 | 63661.3 ± 43046.4 | 19094.8 ± 14290.9 |



Human monocytes were incubated with M-CSF (20ng/ml) and either a ALOX15 inhibitor or vehicle (37°C, 5% CO<sub>2</sub>). On day 7 incubations were quenched with ice-cold methanol and lipid mediators identified using LC/MS-MS based profiling. Results are mean  $\pm$  SEM and expressed in pg/1x10<sup>7</sup> cells. Q1, M-H (parent ion); and Q3, diagnostic ion in the MS-MS (daughter ion). \* p<0.05 using Mann Whitney test.

**Table S2: Altered lipid mediator profiles in monocytes from ALOX15 deficient mice. Related to Figure 1 and Supplemental Figure 1.**

| <b>DHA bioactive metabolome</b>       | <b>Q1</b> | <b>Q3</b> | <b>WT</b>        | <b>ALOX15<sup>-/-</sup></b> |
|---------------------------------------|-----------|-----------|------------------|-----------------------------|
| RvD1                                  | 375       | 141       | 1.63 ± 0.78      | 0.19 ± 0.20                 |
| RvD2                                  | 375       | 141       | 2.00 ± 1.37      | 0.20 ± 0.17                 |
| RvD3                                  | 375       | 147       | 0.17 ± 0.08      | 0.01 ± 0.02                 |
| RvD4                                  | 375       | 101       | 1.96 ± 1.31      | 0.14 ± 0.07                 |
| RvD5                                  | 359       | 199       | 23.03 ± 11.87    | 2.99 ± 2.14                 |
| RvD6                                  | 359       | 101       | 0.60 ± 0.34      | 0.00 ± 0.00                 |
| 17R-RvD1                              | 375       | 141       | 0.83 ± 0.30      | 0.08 ± 0.08 *               |
| 17R-RvD3                              | 375       | 147       | 0.66 ± 0.34      | 0.10 ± 0.06                 |
| PD1                                   | 359       | 153       | 2.08 ± 1.15      | 0.13 ± 0.07                 |
| 10S,17S-diHDHA                        | 359       | 153       | 31.28 ± 17.71    | 0.30 ± 0.19                 |
| 17R-PD1                               | 359       | 153       | 1.69 ± 1.17      | 0.02 ± 0.01                 |
| 22-OH-PD1                             | 375       | 153       | 0.16 ± 0.11      | 0.05 ± 0.04                 |
| MaR1                                  | 359       | 221       | 17.48 ± 4.89     | 0.57 ± 0.62 *               |
| MaR2                                  | 359       | 191       | 1.55 ± 1.17      | 0.07 ± 0.07                 |
| 7S,14S-diHDHA                         | 359       | 221       | 8.52 ± 4.03      | 0.14 ± 0.12 *               |
| 22-OH-MaR1                            | 375       | 221       | 2.70 ± 2.40      | 0.32 ± 0.32                 |
| 4S,14S-diHDHA                         | 359       | 101       | 3.22 ± 2.30      | 0.15 ± 0.14                 |
| 14-oxo-MaR1                           | 357       | 248       | 1.20 ± 0.95      | 0.11 ± 0.10                 |
| <b>n-3 DPA bioactive metabolome</b>   |           |           |                  |                             |
| RvT1                                  | 377       | 239       | 15.45 ± 4.39     | 1.40 ± 1.46 *               |
| RvT2                                  | 377       | 197       | 9.08 ± 4.20      | 0.97 ± 0.43 *               |
| RvT3                                  | 377       | 197       | 2.93 ± 1.67      | 0.11 ± 0.07                 |
| RvT4                                  | 361       | 211       | 34.31 ± 19.67    | 0.91 ± 1.03                 |
| RvD1 <sub>n-3 DPA</sub>               | 377       | 143       | 2.48 ± 2.06      | 0.33 ± 0.20                 |
| RvD2 <sub>n-3 DPA</sub>               | 377       | 143       | 0.97 ± 0.52      | 0.15 ± 0.09                 |
| RvD5 <sub>n-3 DPA</sub>               | 361       | 199       | 3.67 ± 0.13      | 1.08 ± 0.23 *               |
| PD1 <sub>n-3 DPA</sub>                | 361       | 183       | 1.59 ± 0.53      | 0.00 ± 0.00 *               |
| PD2 <sub>n-3 DPA</sub>                | 361       | 263       | 1.86 ± 0.86      | 0.05 ± 0.03 *               |
| 10S, 17S-diHDPA                       | 361       | 183       | 1.49 ± 0.45      | 0.01 ± 0.01 *               |
| Δ15trans-PD1 <sub>n-3 DPA</sub>       | 361       | 183       | 1.93 ± 0.99      | 0.08 ± 0.04 *               |
| 10epi-Δ15trans-PD1 <sub>n-3 DPA</sub> | 361       | 183       | 1.49 ± 0.45      | 0.14 ± 0.10 *               |
| MaR1 <sub>n-3 DPA</sub>               | 361       | 249       | 0.70 ± 0.48      | 0.08 ± 0.08                 |
| 7S, 14S-diHDPA                        | 361       | 249       | 8.85 ± 5.22      | 0.57 ± 0.43                 |
| <b>EPA bioactive metabolome</b>       |           |           |                  |                             |
| RvE1                                  | 349       | 195       | 2.36 ± 1.43      | 0.28 ± 0.24                 |
| RvE2                                  | 333       | 199       | 1.39 ± 0.95      | 0.25 ± 0.15                 |
| RvE3                                  | 333       | 201       | 3.11 ± 1.88      | 0.42 ± 0.42                 |
| <b>AA bioactive metabolome</b>        |           |           |                  |                             |
| LXA <sub>4</sub>                      | 351       | 217       | 1.66 ± 0.69      | 0.03 ± 0.02 *               |
| LXB <sub>4</sub>                      | 351       | 221       | 12.41 ± 4.13     | 4.86 ± 3.35                 |
| 5S,15S-diHETE                         | 335       | 235       | 84.99 ± 58.58    | 6.92 ± 4.78                 |
| 15R-LXA <sub>4</sub>                  | 351       | 217       | 2.02 ± 0.83      | 6.03 ± 4.01                 |
| 15R-LXB <sub>4</sub>                  | 351       | 221       | 1.92 ± 1.12      | 0.28 ± 0.14                 |
| LTB <sub>4</sub>                      | 335       | 195       | 348.45 ± 98.93   | 97.71 ± 83.25 *             |
| 5S,12S-diHETE                         | 335       | 195       | 0.00 ± 0.00      | 0.00 ± 0.00                 |
| 20-OH-LTB <sub>4</sub>                | 351       | 195       | 2.73 ± 1.81      | 0.02 ± 0.02                 |
| PGD <sub>2</sub>                      | 351       | 189       | 1256.77 ± 411.18 | 129.81 ± 104.81 *           |
| PGE <sub>2</sub>                      | 351       | 189       | 397.88 ± 215.48  | 32.80 ± 26.30               |
| PGF <sub>2α</sub>                     | 353       | 193       | 730.81 ± 330.29  | 71.06 ± 65.35 *             |
| TxB <sub>2</sub>                      | 369       | 169       | 2374.02 ± 784.55 | 131.47 ± 112.91 *           |

Bone marrow monocytes ( $2 \times 10^6$  cells/mL) were incubated with *E. coli* ( $2 \times 10^8$  cells/mL) for 45 minutes at 37°C. Incubations were quenched with ice-cold methanol and lipid mediators identified using LC/MS-MS based profiling. Results are mean  $\pm$  SEM and expressed in pg/ $1 \times 10^7$  cells. Q1, M-H (parent ion); and Q3, diagnostic ion in the MS-MS (daughter ion). \*  $p < 0.05$  using Mann Whitney test.

**Table S3: Tissue resident macrophages from ALOX15 mice display and altered expression of lineage markers that is rescued by PD1<sub>n-3 DPA</sub> administration.** Related to Figure 1 and Figure 7.

| Large Peritoneal Macrophages |                  |                          |                                                   |
|------------------------------|------------------|--------------------------|---------------------------------------------------|
| Lineage Marker               | WT               | 12/15-LOX <sup>-/-</sup> | 12/15-LOX <sup>-/-</sup> + PD1 <sub>n-3 DPA</sub> |
| TIM 4                        | 11479.5 ± 1285.4 | 7487.1 ± 1108.7 *        | 10738.4 ± 1767.6                                  |
| CD64                         | 5112.7 ± 460.6   | 5299.6 ± 478.1           | 5267.6 ± 802.9                                    |
| TGFβ                         | 924.9 ± 112.0    | 647.1 ± 124.2            | 1106.9 ± 162.8 #                                  |
| MHCII                        | 10338.4 ± 772.9  | 9914.0 ± 1200.7          | 9471.4 ± 1791.3                                   |
| Arg-1                        | 1192.0 ± 254.3   | 2004.1 ± 223.5 *         | 1398.8 ± 333.3                                    |
| IL-10                        | 621.4 ± 86.9     | 911.1 ± 46.0 **          | 787.4 ± 113.8                                     |
| CD11b                        | 7844.2 ± 856.0   | 11380.1 ± 737.9 **       | 9023.9 ± 1028.7 #                                 |

| Small Peritoneal Macrophages |                     |                       |                                                |
|------------------------------|---------------------|-----------------------|------------------------------------------------|
| Lineage Marker               | WT                  | ALOX15 <sup>-/-</sup> | ALOX15 <sup>-/-</sup> + PD1 <sub>n-3 DPA</sub> |
| TIM-4                        | 1741.6 ± 160.8      | 1129.3 ± 175.9 *      | 1680.4 ± 313.8                                 |
| CD64                         | 7908.3 ± 569.2      | 10092.6 ± 698.8 *     | 8196.0 ± 984.2                                 |
| TGFβ                         | 117.2 ± 7.6         | 181.5 ± 15.4 **       | 140.1 ± 12.7 #                                 |
| MHCII                        | 5972.0 ± 250.4      | 4923.7 ± 335.9 *      | 5943.4 ± 767.6                                 |
| Arg-1                        | 4284.9 ± 354.0      | 3356.3 ± 219.6 *      | 4160.4 ± 544.7                                 |
| IL-10                        | 365.1 ± 25.7        | 452.6 ± 41.4          | 357.9 ± 14.2 #                                 |
| CD11b                        | 296952.6 ± 111533.7 | 125432.1 ± 30807.4    | 490012.7 ± 204253.1 #                          |

| Splenic Macrophages |                 |                       |                                                |
|---------------------|-----------------|-----------------------|------------------------------------------------|
| Lineage Marker      | WT              | ALOX15 <sup>-/-</sup> | ALOX15 <sup>-/-</sup> + PD1 <sub>n-3 DPA</sub> |
| PTGS2               | 701.0 ± 22.2    | 894.7 ± 4.4 **        | 792.3 ± 14.4 ##                                |
| iNOS                | 3822.8 ± 273.1  | 4589.0 ± 184.4        | 4066.7 ± 290.0                                 |
| CD64                | 7528.5 ± 468.8  | 9644.3 ± 292.0 *      | 8484.7 ± 315.6                                 |
| TGFβ                | 72.2 ± 9.3      | 118.7 ± 7.2 *         | 96.2 ± 9.9                                     |
| MHCII               | 11416.3 ± 461.6 | 10378.7 ± 369.3       | 10847.0 ± 247.2                                |
| CD11c               | 347.8 ± 6.0     | 501.0 ± 33.6 *        | 405.7 ± 18.8                                   |
| Arg-1               | 70.6 ± 7.6      | 170.0 ± 10.6 **       | 129.3 ± 4.1 #                                  |
| IL-10               | 123.0 ± 2.0     | 154.7 ± 2.2 **        | 136.7 ± 1.7 #                                  |
| CD11b               | 2129.0 ± 172.6  | 4029.7 ± 174.9 **     | 2476.7 ± 92.3 #                                |

Tissue resident macrophages were collected from WT mice given vehicle (PBS) or ALOX<sup>-/-</sup> mice given either vehicle or 10ng PD1<sub>n-3 DPA</sub> daily for 7 days. The expression of lineage markers was determined using flow cytometry and fluorescently labeled antibodies. Results are mean ± SEM n=7 mice per group for Large and small peritoneal macrophages n= 7 and splenic macrophages n=4 mice per group. \* P < 0.05; \*\* P <0.01 vs WT vehicle group; # P < 0.05; \*\* P <0.01 vs ALOX15 vehicle group.
